# Supplementary material for: Identification of Antifungal H+-ATPase Inhibitors with Effect on Plasma Membrane Potential
Source: PubMed Central journal article supplement (PMC5487681; doi:10.1128/aac.00032-17), 2017-06-27
Supplement: AAC.00032-17_zac007176290s1.pdf [file AAC.00032-17_zac007176290s1.pdf]

1 **Supplementary information**

2

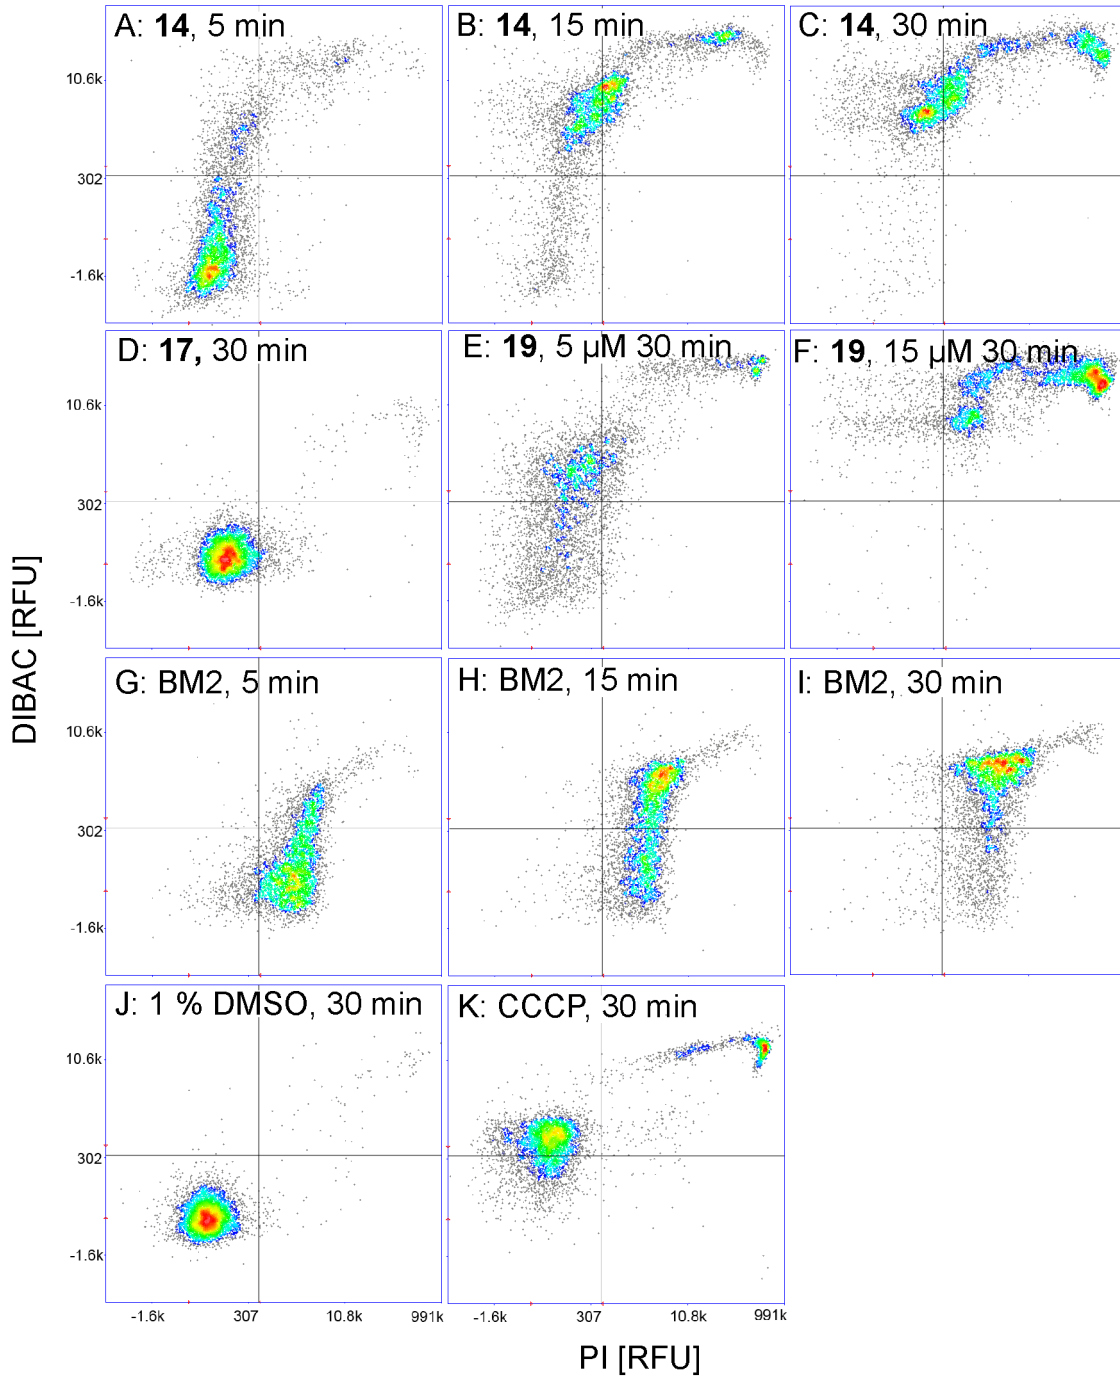

3

4 **Fig. S1. Effect of inhibitors on membrane potential and membrane integrity in *S. cerevisiae*.**  
5 Untreated cells (1 % DMSO) remain in the lower left corner. Cells experiencing membrane  
6 depolarization exhibit an increased DiBAC signal (y-axis), and cells with decreased membrane  
7 integrity exhibited an increased PI signal (x-axis). *Upper row:* Cells treated with compound **1** (15  $\mu$ M)  
8 for 5 (**A**), 15 (**B**) or 30 min (**C**). *Second row:* Cells treated with compound 15  $\mu$ M **17** (**D**), compound **19**  
9 at 5  $\mu$ M (**E**) or 15  $\mu$ M (**F**) for 30 min. *Third row:* Cells treated with BM2 (5  $\mu$ M) for 5 (**G**), 15 (**H**) or  
10 30 min (**I**). *Lower row:* Cells treated with DMSO (1 %, **J**) or CCCP (150  $\mu$ M, **K**) for 30 min. The 4  
11 quadrants in each graph define cells as DiBAC positive (top quadrants) or negative (lower quadrants)  
12 and PI positive (quadrants to the right) or negative (quadrants to the left). The color gradient of gray  
13 (lowest) to red (highest) represents cell density. The figures in S1 are representative of the data  
14 presented in Fig. 4.

15

16

17

18

|            | Growth inhibition ( $\mu\text{M}$ ) |                                            |
|------------|-------------------------------------|--------------------------------------------|
|            | MIC                                 |                                            |
|            | <i>C. albicans</i><br>in RPMI       | <i>C. albicans</i><br>in RPMI +<br>10% FBS |
| <b>14</b>  | 36                                  | 75                                         |
| <b>15</b>  | 4.8                                 | 24                                         |
| <b>16</b>  | 15                                  | 36                                         |
| <b>17</b>  | 150                                 | 150                                        |
| <b>18</b>  | 75                                  | 75                                         |
| <b>19</b>  | 7                                   | >38                                        |
| <b>BM2</b> | 15                                  | 36                                         |

20 **Table S2. *Candida albicans* growth assay in absence and presence of 10 % FBS. ( $n = 3$ )**
